# Supplementary material
Source: PubMed Central journal article supplement (PMC6309534)
Supplement: NIHMS976944-supplement-supplement_1.pdf [file NIHMS976944-supplement-supplement_1.pdf]

# Supplemental

Figure 1

A

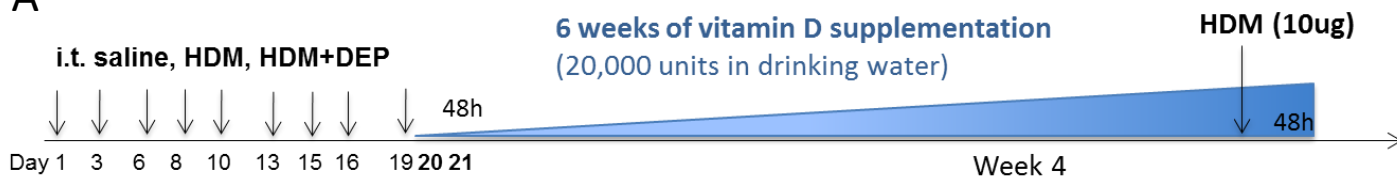

B

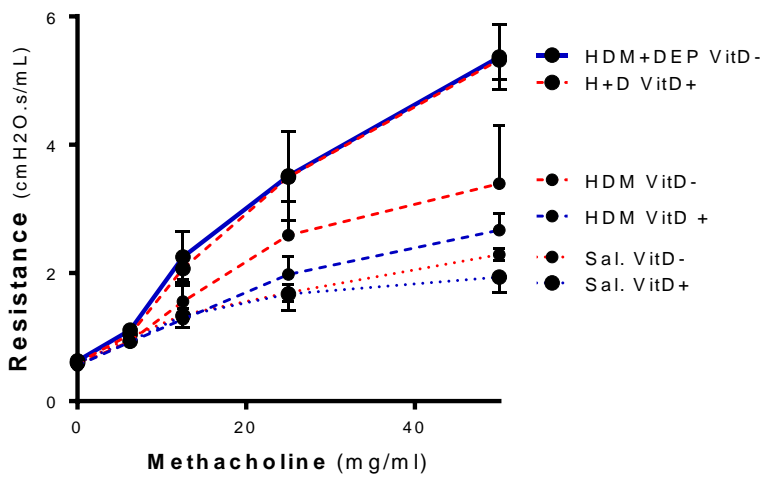

# Supplemental

## Figure 2

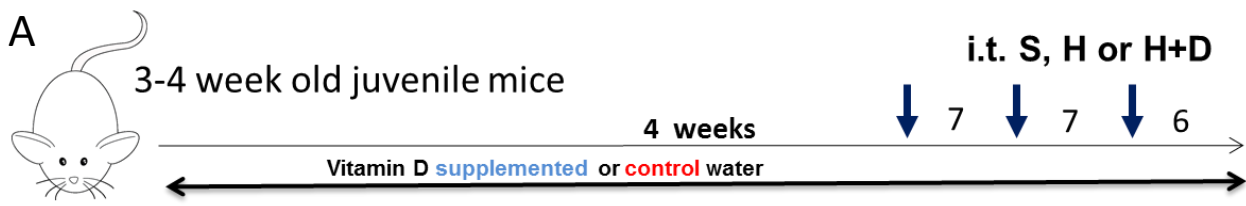

Balb/c mice

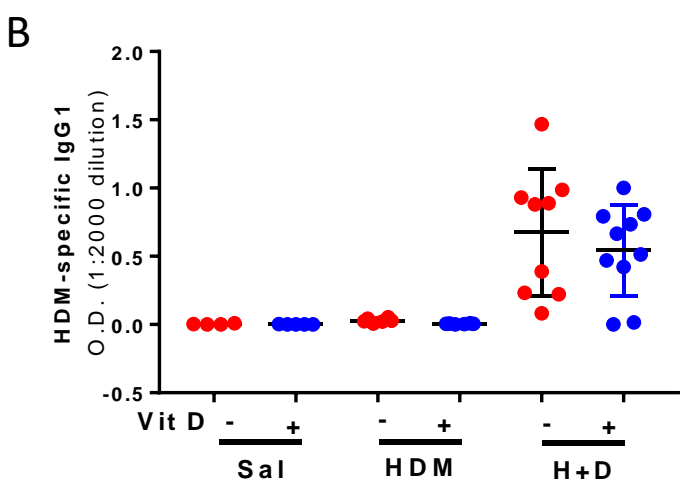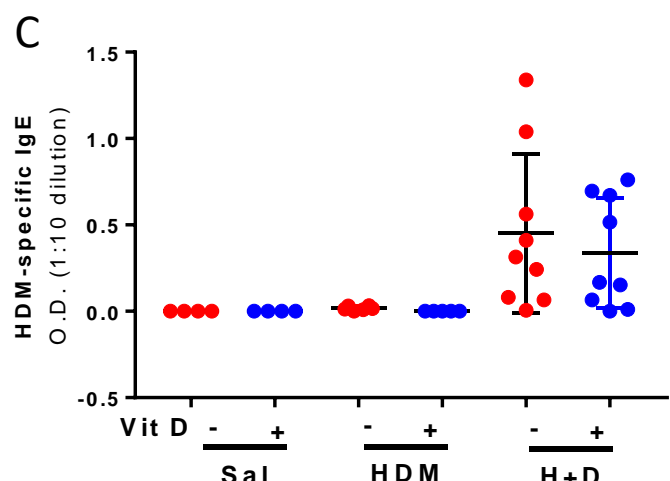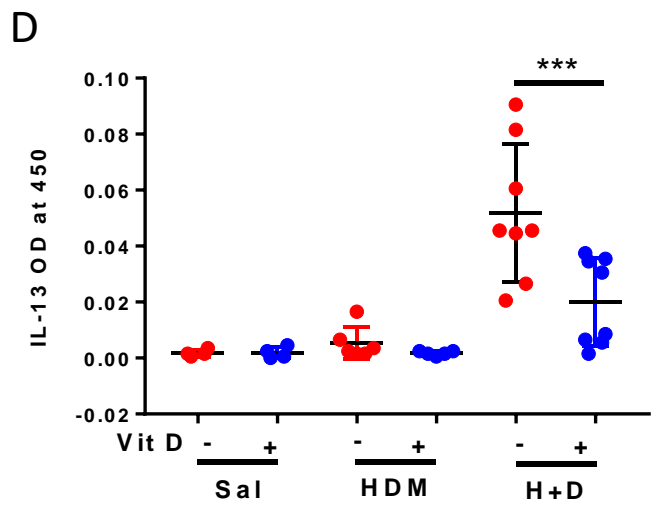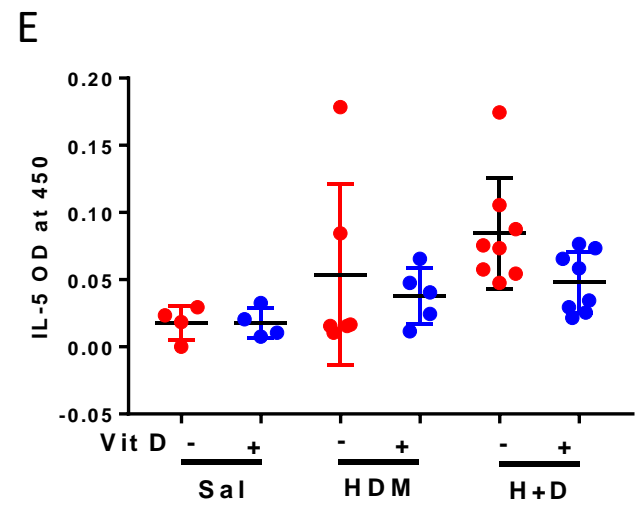

1 **Online Repository Materials**

2 **Supplemental Methods**

3 **Murine Models**

4 To assess vitamin D as a treatment, BALB/c mice were challenged intratracheal with saline,  
5 HDM, and H+D three times a week for three weeks to establish airway disease. Then a subset  
6 of mice was given either control water or water supplemented with 20,000 IU cholecalciferol  
7 (Sigma) *ad libitum* for 6 weeks (to attain sufficient vitamin D levels) prior to a single HDM (10µg)  
8 intratracheal challenge. For the vitamin D sensitization experiment, mice were challenged once  
9 a week for three weeks with saline, HDM, or HDM+DEP. Six days after the last intratracheal  
10 challenge, lungs, spleen, and mediastinal lymph nodes were plated at 100,000 cells per well in  
11 triplicate and *ex vivo* stimulated with HDM (25µg) for six days prior to supernatant collection.

12

13 **ELISA**

14 Plasma HDM-specific IgE and IgG1 levels and supernatant IL-13 levels (free and IL-  
15 13Rα2-bound) were assessed as previously described(13). IL-5 levels were determined  
16 using the IL-5 ELISA kit (Biolegend, San Diego, CA).

17

18

19 **Supplemental Figure 1. Vitamin D restoration after established asthma had no impact on**  
20 **AHR upon re-challenge with HDM.**

21 (A) Protocol: BALB/c mice were exposed to saline, HDM, or HDM+DEP. A subset of mice were  
22 placed on vitamin D supplemented water for 6 weeks to restore vitamin D levels. The mice then  
23 received a single challenge of HDM (10µg). (B). Airway responsiveness was measured 48 hours  
24 after the last challenge. (n=4-8 mice per group).

25

26 **Supplemental Figure 2. Vitamin D does not significantly impact sensitization.**

27 (A) Protocol: Vitamin D supplemented or deficient BALB/c mice were exposed to saline, HDM,  
28 or HDM+DEP once a week for three weeks. Mice were sacrificed six days later and lung cells  
29 were *ex vivo* stimulated with HDM for 6 days prior to culture supernatant collection. (B) HDM  
30 specific IgG1 levels. (C) HDM specific IgE levels. (D) IL-13 O.D. levels (E) IL-5 O.D. levels .  
31 \*\*\*\*p< 0.0001, \*\*\*p <.001, \*\*p <.01, \*p < 0.05 using 1-way ANOVA with Bonferroni's multiple  
32 comparison test. (n=4-9 mice per group).

33

34

35
